# Supplementary material
Source: publisher figshare collection journal article supplement (https://karger.figshare.com/articles/dataset/_/3969144)
Supplement: Supplementary file 1 [file 1]

**Table E1**

|                                                 | <b>Diluent</b> | <b>IL-25<br/>(1 pg/ml)</b> |
|-------------------------------------------------|----------------|----------------------------|
| <b>RANTES<br/>(500 ng/ml)</b>                   | 17 ± 4         | 20 ± 7                     |
| <b>MCP-1<br/>(500 ng/ml)</b>                    | 7 ± 2          | 12 ± 1                     |
| <b>SDF-1<math>\alpha</math><br/>(100 ng/ml)</b> | 15 ± 7         | 12 ± 1                     |

Pre-incubation (2 hr, 37°C) with IL-25 (1 pg/ml) did not prime mature eosinophil migration to sub-optimal concentrations of SDF-1 $\alpha$  (100 ng/mL), RANTES (500 ng/mL) or MCP-1 (500 ng/mL) (n=3 for each). Values are presented as mean with SEM in parentheses.
