# Supplementary material
Source: publisher figshare collection journal article supplement (https://karger.figshare.com/articles/dataset/_/3969144)
Supplement: Supplementary file 2 [file 1]

**Figure E1:** A representative plot from one subject showing the flow cytometric sequential multi-gating strategy to identify (A) peripheral blood-derived eosinophils (CD45+16-) cells) using FlowJo software on a LSRII. (B) Plots show percent cell surface expression of IL-17RA, IL-17RB and intracellular IL-25 expression in eosinophils where specific antibody staining is compared to isotype control antibody set at a 98% confidence limit. Absolute cell numbers were calculated by multiplying the % positive quadrant static (upper right quadrant) with the absolute eosinophil count and expressed per million white blood cells.

**Figure E2:** Multi-parametric sequential-gating strategy to identify (A) Th2 memory cells (CD3+CD4+CRTH2+ cells) in blood using FlowJo software on a LSRII. (B) Plots show specific antibody (open histogram) and isotype control (closed histogram) staining for IL-17RA, IL-17RB and IL-25 with a 98% confidence limit. Absolute cell numbers were calculated by multiplying the % positive quadrant static (upper right quadrant) with the absolute Th2 cell count and expressed per million white blood cells.
